# Supplementary material
Source: PubMed Central journal article supplement (PMC140943)

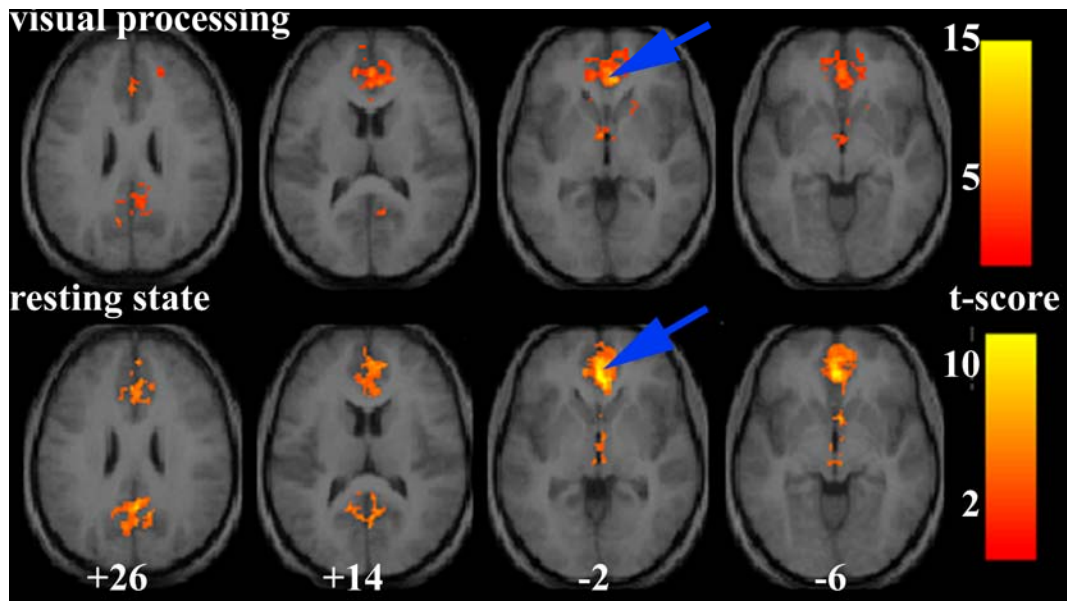

Supplement: pnas_0135058100_5.pdf [file pnas_0135058100_5.pdf]
